# Supplementary material for: Modeling the Cost-Effectiveness of Interventions to Reduce Suicide Risk Among Hospital Emergency Department Patients
Source: Atypon-hosted journal article supplement (doi:10.1176/appi.ps.201600351), 2017-09-25

Supplemental eFigure 1a: Flow through hospital Emergency Department for patients with true “high” or “low” suicide risk

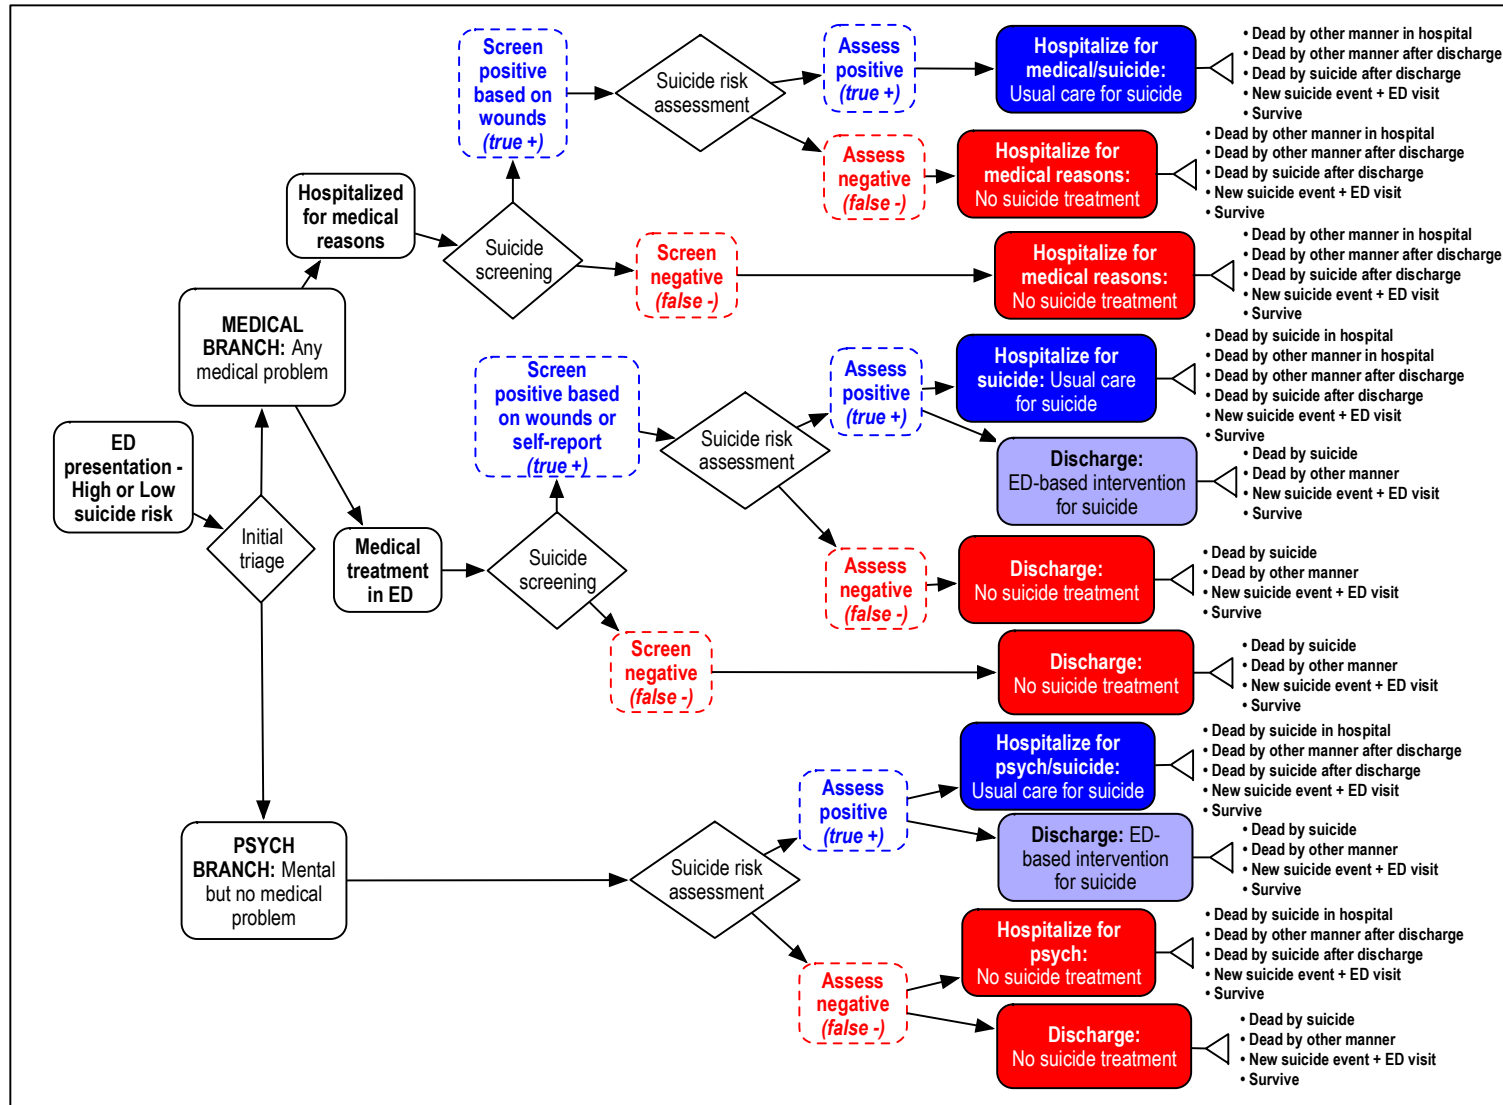

**Supplemental eFigure 1b: Flow through hospital Emergency Department for patients with true “no” suicide risk**

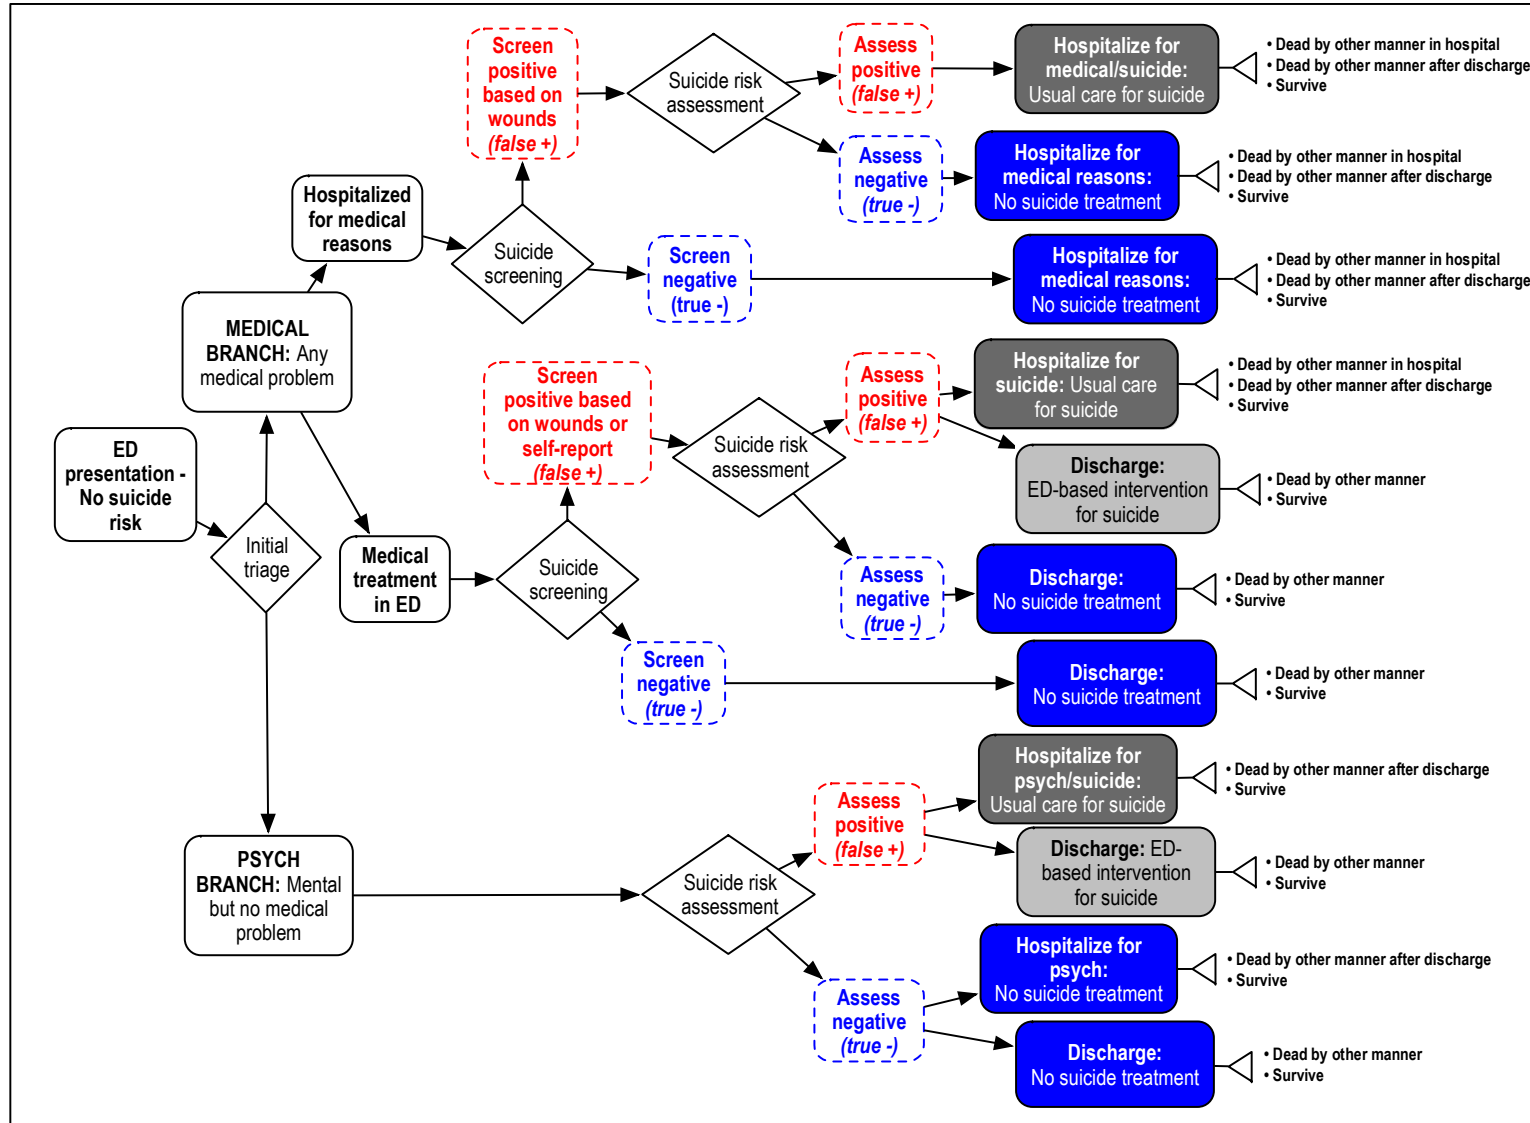



**Supplemental eFigure 2: Acceptability Curves**

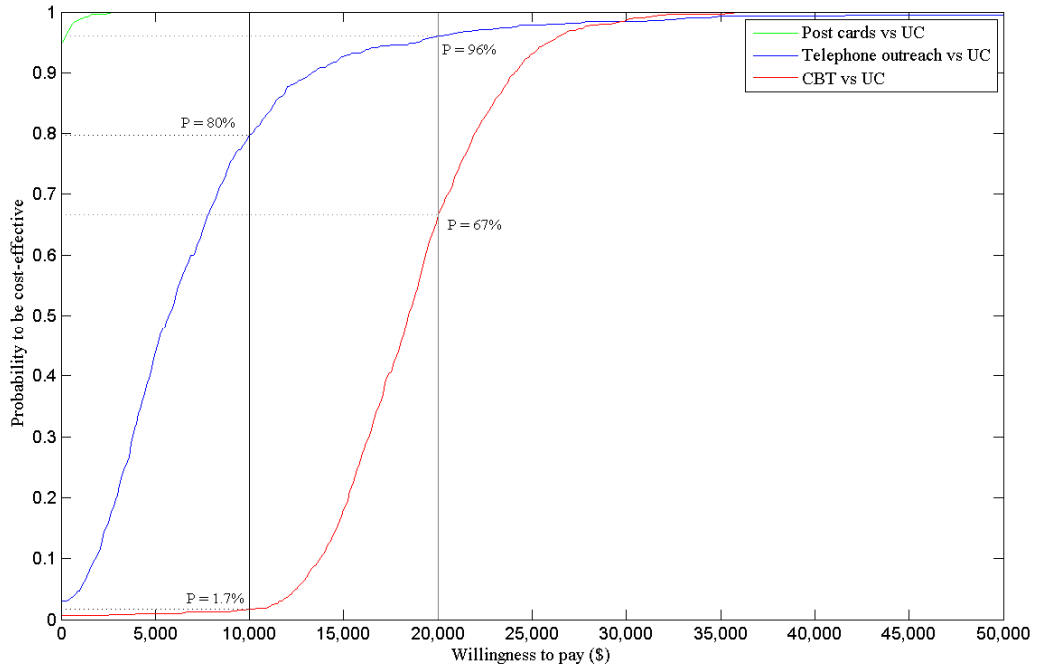

**Supplemental eFigure 3a: Two-way Sensitivity Analysis, Incremental Costs vs. Effect Size, Postcards (PC) vs. Usual Care (UC)**

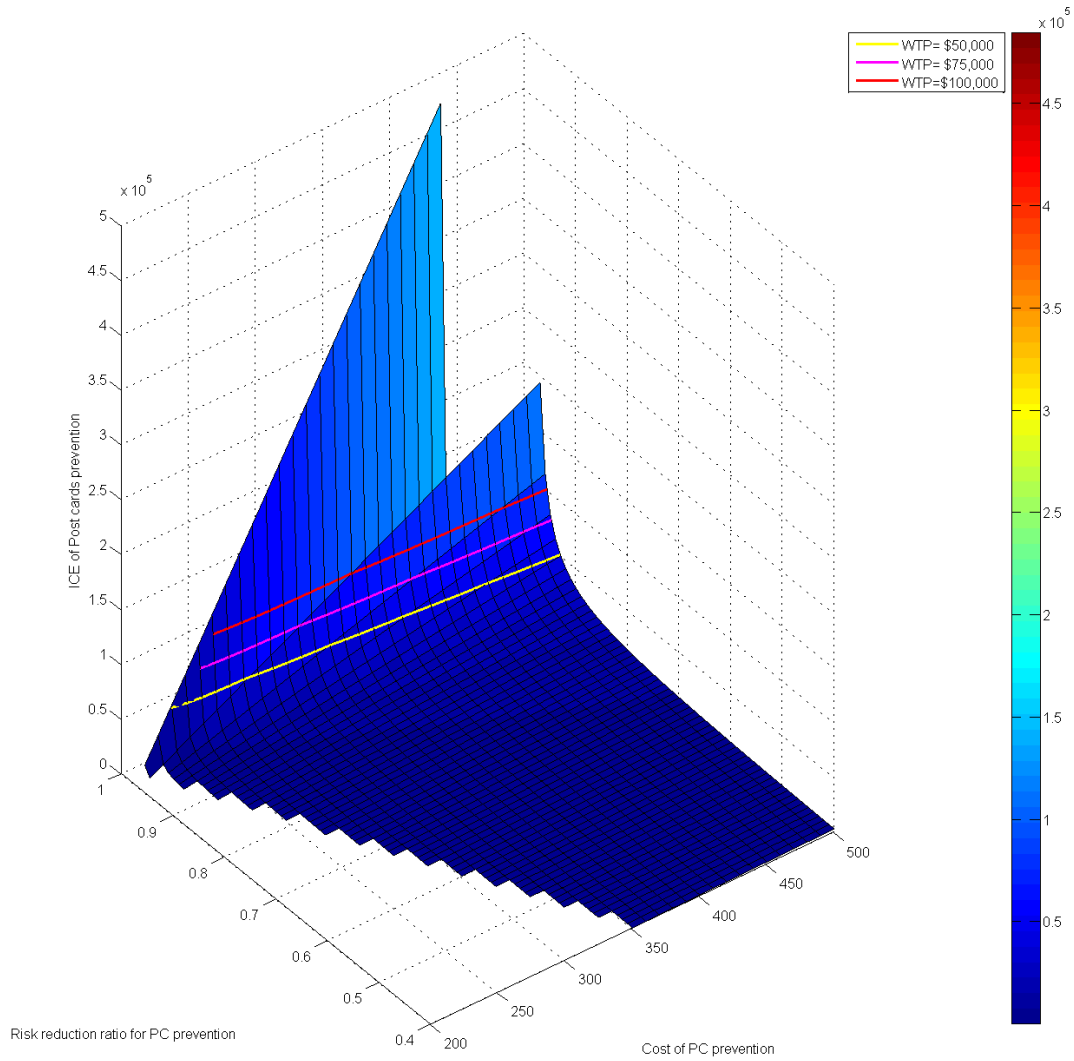

**Supplemental eFigure 3b: Two-way Sensitivity Analysis, Incremental Costs vs. Effect Size, Telephone Outreach (TO) vs. Usual Care (UC)**

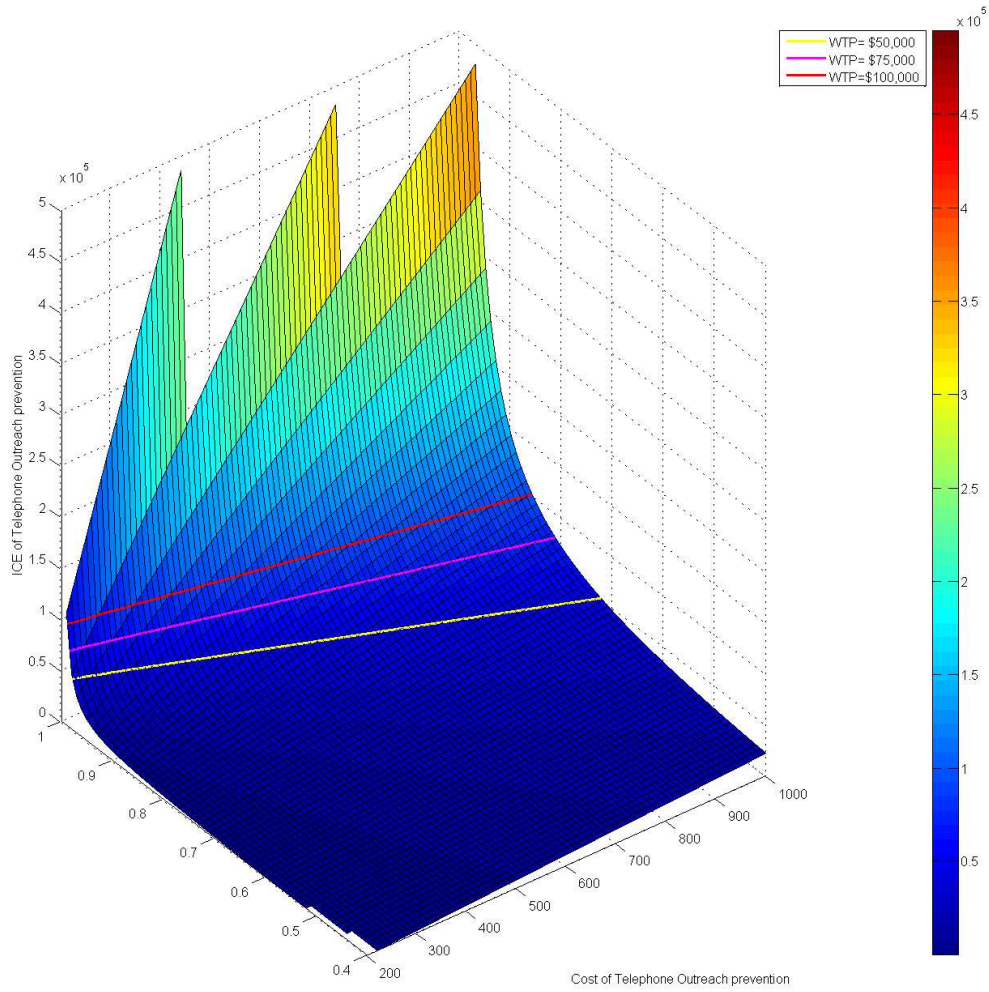

**Supplemental eFigure 3c: Two-way Sensitivity Analysis, Incremental Costs vs. Effect Size, Cognitive Behavioral Therapy (CBT) vs. Usual Care (UC)**

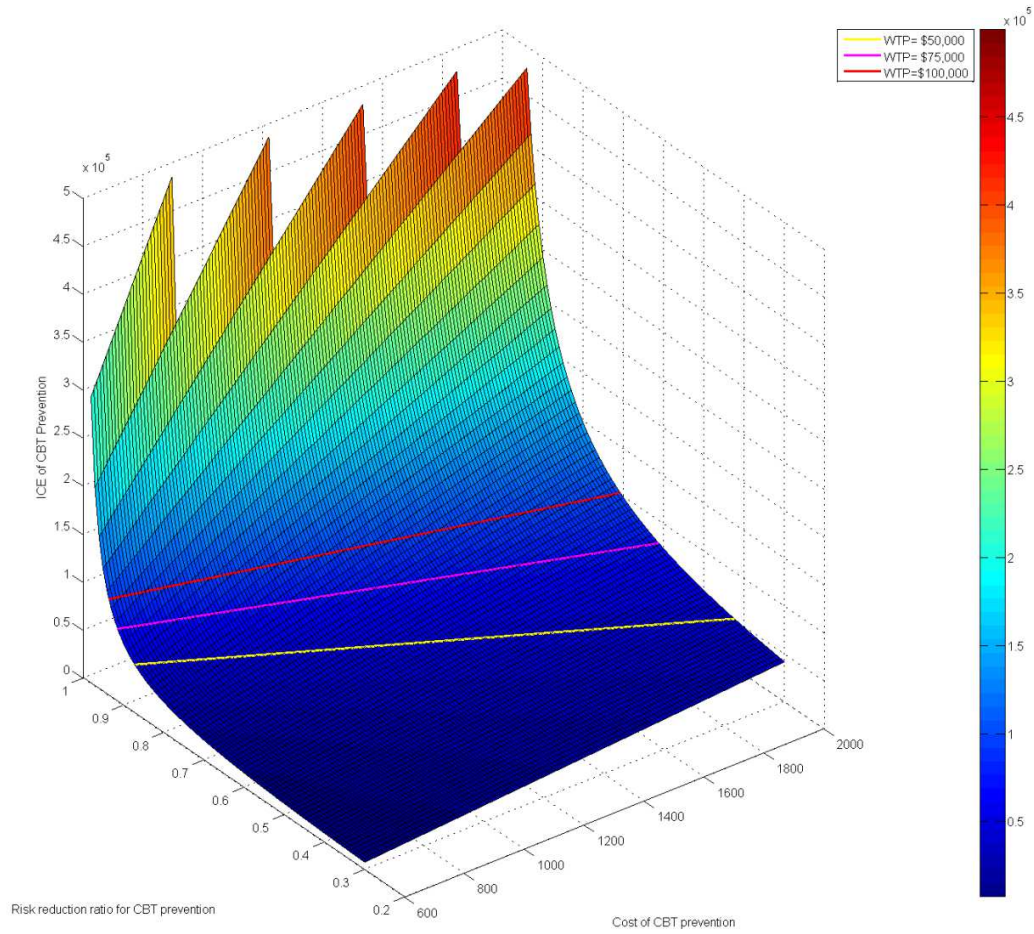

Supplement: appi.ps.201600351.ds001.pdf [file appi.ps.201600351.ds001.pdf]
